# Supplementary material for: The EXTREME Regimen Associating Cetuximab and Cisplatin Favors Head and Neck Cancer Cell Death and Immunogenicity with the Induction of an Anti-Cancer Immune Response
Source: MDPI journal article supplement (doi:10.3390/cells11182866), 2022-09-14
Supplement: s1 [file s1]

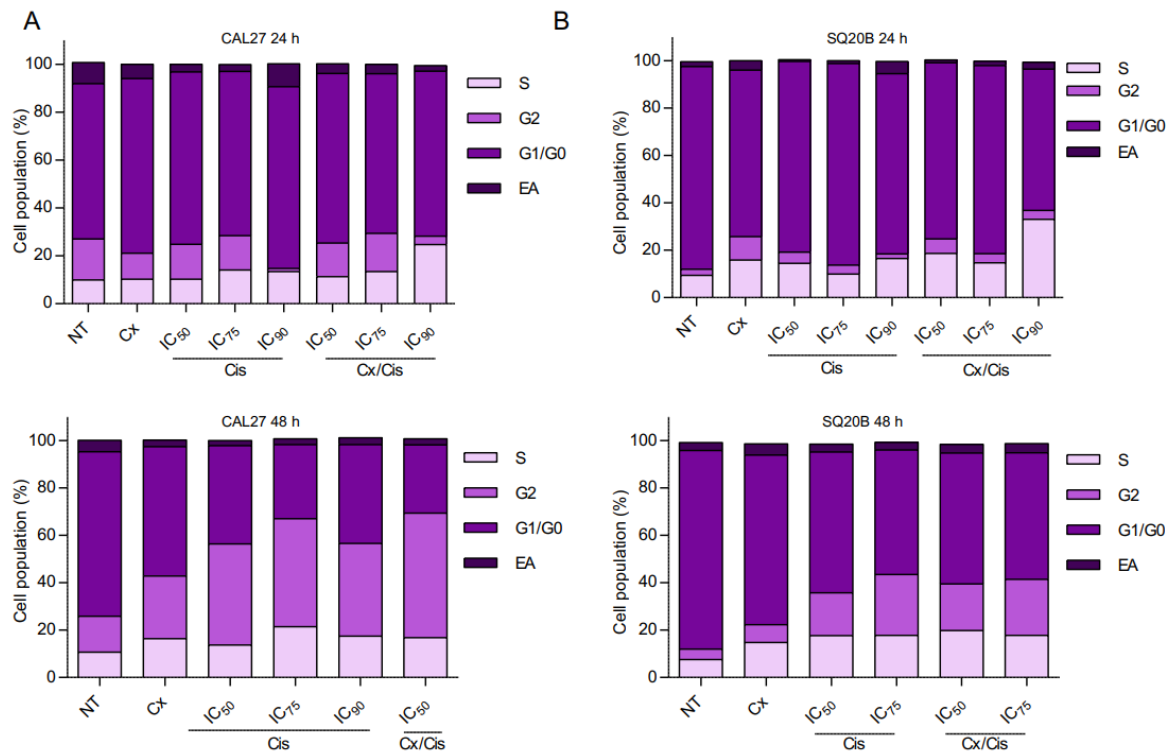

**Figure S1.** A,B. Quantification of the cell cycle distribution data of CAL27 (A) and SQ20B (B) cells treated 24 h (upper histograms) and 48 h (lower histograms) with cetuximab (Cx), cisplatin (Cis) at the IC<sub>50</sub> and IC<sub>75</sub> and the Cx/Cis combination. The histograms show the mean number of percentages of cells in S, G2, G1/G0, and early apoptosis (EA; i.e., sub-G1);.

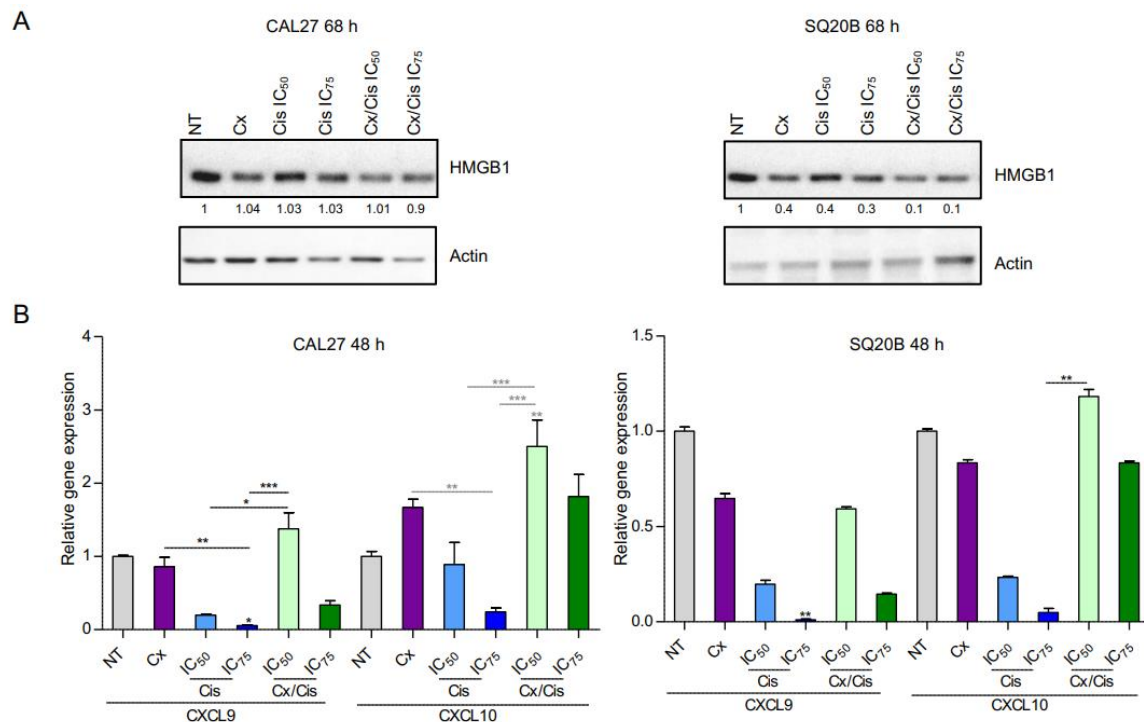

**Figure S2.** A. Western blot analysis of the HMGB1 expression in the supernatant from CAL27 (left panels) and SQ20B (right panels) cell cultures

harvested 68 h after with cetuximab (Cx), cisplatin (Cis) at the IC<sub>50</sub> and IC<sub>75</sub> and the Cx/Cis combination. Signals were quantified respectively to the actin loading Cells 2022, 11, x FOR PEER REVIEW 21 of 24 control and normalized with respect to the non-treated control (quantification results are shown). The blots that are shown are re A representative examples of three independent experiments. Additional independent biological replicates are shown in supporting documents. B. Analysis of the expression of CXCL9 and CXCL10 by RT-qPCR in CAL27 (left histograms) and SQ20B (right histograms) cells treated for 48 h with cetuximab (Cx), cisplatin (Cis) at the IC<sub>50</sub> and IC<sub>75</sub> and the Cx/Cis combination. Data are represented as the mean from one independent experiment +SEM;.

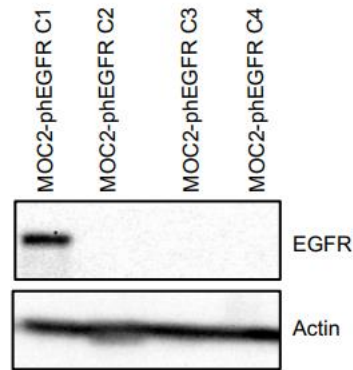

**Figure S3.** Western blot analysis of EGFR expression in whole-cell protein extracts from MOC-2 cells transduced with a pBABE-hEGFR expression plasmid after selection of clones on puromycin. EGFR expression is observed in the MOC2-phEGFR C1 clone. The blots that are shown are representative examples of three independent experiments;.

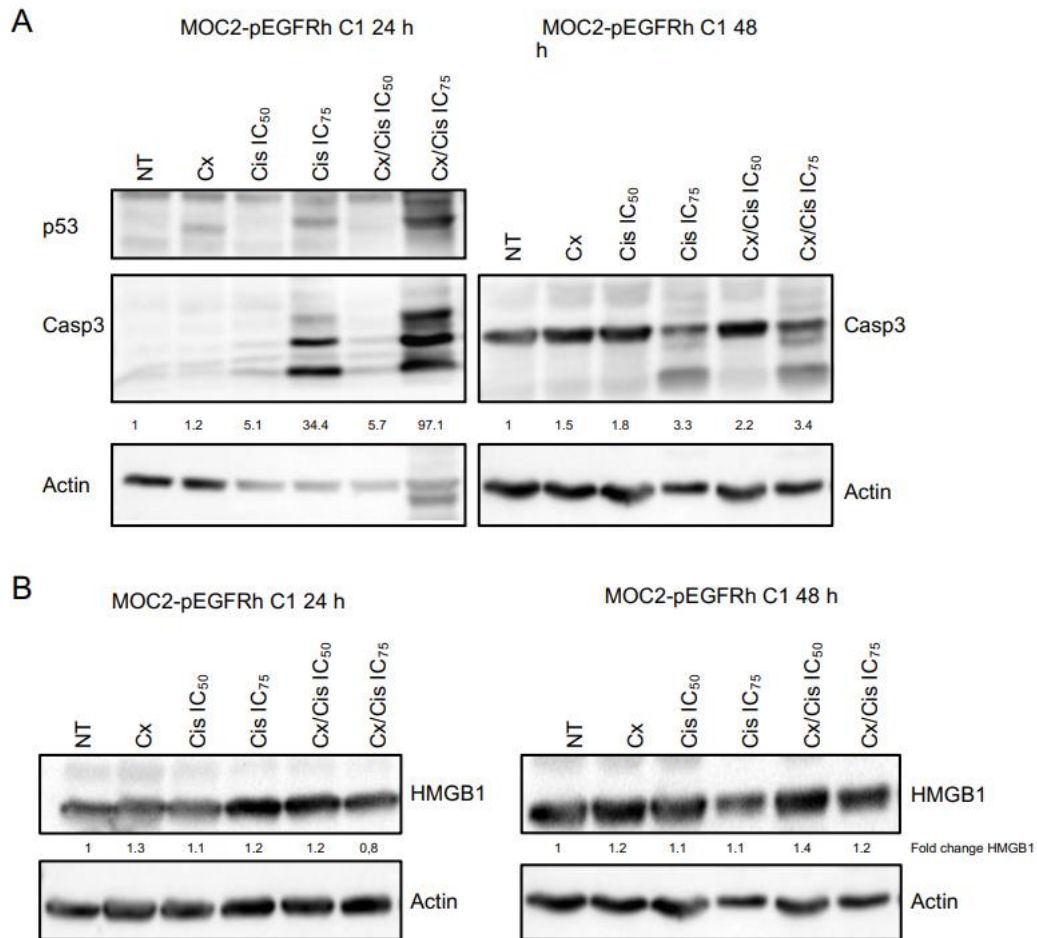

**Figure S4.** A. Western blot analysis of p53 and cleaved caspase-3 (Casp3) expression in whole protein extracts from MOC2-phEGFR C1 cells treated with cetuximab (Cx), cisplatin (Cis) at the IC<sub>50</sub>, IC<sub>75</sub>, and IC<sub>90</sub>, and the Cx/Cis combination for 24 h (left panels) and 48 h (right panels). Casp3 signals were quantified respectively to the actin loading control and normalized with respect to the non-treated control (quantification results are shown). B. Western blot analysis of the HMGB1 expression in whole protein extracts from MOC2-phEGFR C1 cell cultures treated for 24 h (left panels) and 48 h (right panels) with cetuximab (Cx), cisplatin (Cis) at the IC<sub>50</sub>, and IC<sub>75</sub> and the Cx/Cis combination. Signals were quantified respectively to the actin loading control and normalized with respect to the non-treated control (quantification results are shown). Blots shown are representative examples of two independent experiments. Additional independent biological replicates are shown in supporting documents.,.
