# Supplementary material for: The EXTREME Regimen Associating Cetuximab and Cisplatin Favors Head and Neck Cancer Cell Death and Immunogenicity with the Induction of an Anti-Cancer Immune Response
Source: MDPI journal article supplement (doi:10.3390/cells11182866), 2022-09-14
Supplement: s1 [file s1]

## Supplementary tables

**Table S1. List of oligonucleotides primers used for RT-qPCR gene expression assays**

| Gene name     | Forward primer (5'-3') | Reverse primer (5'-3')  |
|---------------|------------------------|-------------------------|
| <i>DDB2</i>   | TGGCATCAGTTCGCTTAATG   | ACTTCCGTGTCCTGGCTTC     |
| <i>FDRX2</i>  | TCCTACTGACCCACCTGAG    | TCGACTCTGCCTCAGTACACC   |
| <i>RPS27L</i> | CAGATCGCTTGACGCTTG     | TCTTCCAAGGACGGATGTAGTAA |
| <i>ZMAT3</i>  | GCCAGGAAAGAAGGGAATG    | GCGGGGATTGAAGTAAGGAC    |
| <i>RPLPO</i>  | GAAGGCTGTGGTGCTGATGG   | CCGGATATGAGGCAGCAGTT    |
| <i>GAPDH</i>  | GCACAAGAGGAAGAGAGAGACC | AGGGGAGATTCAGTGTGGTG    |

Gene names, forward and reverse primer sequences are shown

**Table S2. List of TaqMan assays used for RT-qPCR gene expression assays**

| Gene name | TaqMan gene expression assay ID |
|-----------|---------------------------------|
| CXCL9     | Hs00171065_m1                   |
| CXC10     | Hs00171042_m1                   |
| TBP       | Hs00427620_m1                   |

Gene names and TaqMan gene expression assay ID are shown

**Table S3. List of antibodies used for western blot analysis**

| Protein           | Provider              | Antibody dilution                                   |
|-------------------|-----------------------|-----------------------------------------------------|
| Cleaved caspase-3 | Asp175 Cell signaling | 1/1000                                              |
| p53               | DO-1 Santa cruz       | 1/1000                                              |
| p63               | 4A4 Abcam             | 1/1000                                              |
| p73               | EP436Y Abcam          | 1/1000                                              |
| Calreticulin      | D3E6 Cell signaling   | 1/1000                                              |
| EGFR              | D38B1 Cell signaling  | 1/2000                                              |
| HMGB1             | 1856 abcam            | 1/1000 (supernatant)<br>1/5000 (whole cell extract) |
| Actin             | C4                    | 1/10 000                                            |
| GAPDH             | House made            | 1/000                                               |
| BSA               | B2901 sigma           | 1/1000                                              |

Protein names, antibody providers and used antibody dilutions are shown.
